# Supplementary material for: Chicken HOXA3 Gene: Its Expression Pattern and Role in Branchial Nerve Precursor Cell Migration
Source: PubMed Central journal article supplement — Int J Biol Sci. 2011 Jan 19;7(1):87–101. doi: 10.7150/ijbs.7.87 (PMC3030145; doi:10.7150/ijbs.7.87), 2011-01-19

*International Journal of Biological Sciences*

Int. J. Biol. Sci. 2011; 7(1):87-101 - Supplementary Figure 2  
 © Ivyspring International Publisher. All rights reserved

**Supplementary Figure 2:**

RT-PCR analyses of chicken *HOXA3* (A) and mouse *Hoxa3* (B) transcripts. *HOXA3/Hoxa3* cDNA fragments were obtained and amplified from RNA samples of both the anterior (A) and posterior (P) regions of chicken and mouse embryos at various stages. Embryos were cut at r4 into anterior (A) and posterior (P) tissue regions (see Supplementary materials and methods for details). Without the reverse transcriptase step (RT-), these amplifications were not observed. We confirmed that the amounts of RNA used in these reactions from the anterior (A) and posterior (P) tissues were the same by amplifying chicken *GAPDH* and mouse *HPRT* cDNA fragments.

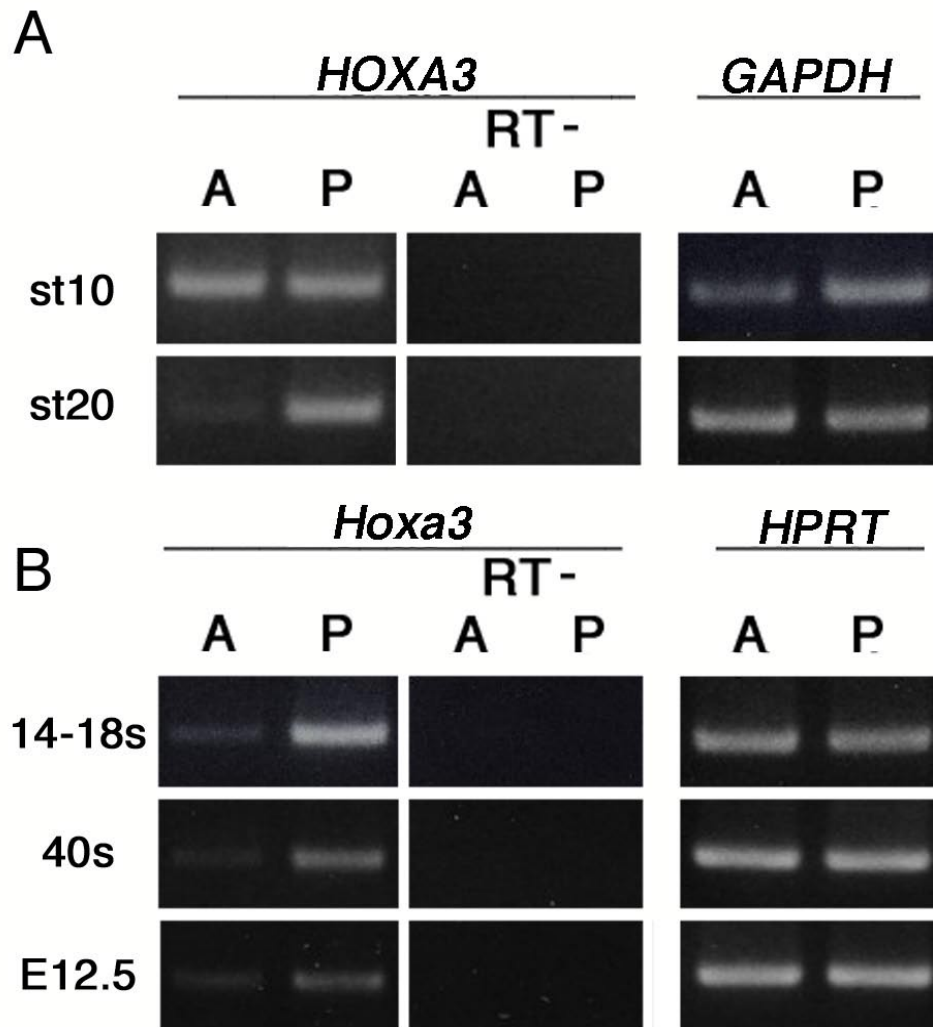

Supplement: ijbsv07p0087s2.pdf [file ijbsv07p0087s2.pdf]
